# Supplementary material
Source: PubMed Central journal article supplement (PMC6153820)
Supplement: zac010187532s1.pdf [file zac010187532s1.pdf]

**Supplementary Table S1 | Genetic modifications detected in ceftazidime and ceftazidime/avibactam evolved *P. aeruginosa* PA14 populations.**

| Gene                                   | Replicate | Mutation      | Localization | Aa Change        |
|----------------------------------------|-----------|---------------|--------------|------------------|
| <b>BOTH TREATMENTS</b>                 |           |               |              |                  |
| <i>nalD</i>                            | 4, 6, 8   | G-->T         | 32           | Thr11Asn         |
| <i>mexB</i>                            | 1         | C-->G         | 1126         | Leu376Val        |
|                                        | 3         | T-->G         | 2300         | Val767Gly        |
|                                        | 6         | C-->T         | 1345         | Leu449Phe        |
|                                        | 8         | C-->T         | 1693         | Pro565Ser        |
| <i>ftsI</i>                            | 1         | G-->A         | 1510         | Arg504Cys        |
|                                        | 5         | C-->T         | 1567         | Val523Met        |
|                                        | 5         | C-->T         | 1511         | Arg504His        |
|                                        | 8         | C-->T         | 851          | Arg284Gln        |
| <i>clpA</i>                            | 1         | Del-A         | 515          | His172fs         |
|                                        | 5         | A-->G         | 1634         | Tyr545Cys        |
| <b>CEFTAZIDIME TREATMENT</b>           |           |               |              |                  |
| <i>mexR</i>                            | 1         | Ins-A         | 80-81        | Glu27fs          |
|                                        | 3         | Del-AAT       | 126-128      | Leu43del         |
| <i>mpl</i>                             | 2         | Del-CGGCGGCTT | 1305-1313    | Phe438_Gly440del |
|                                        | 2         | T-->G         | 371          | Val124Gly        |
|                                        | 4         | T-->G         | 416          | Val139Gly        |
| <i>orfN</i>                            | 2         | Ins-G         | 138-139      | Val50fs          |
| <i>infB</i>                            | 2         | C-->T         | 2407         | Val803Ile        |
| <i>pitA</i>                            | 2         | A-->C         | 133          | Thr45Pro         |
|                                        | 4         | A-->C         | 367          | Thr123Pro        |
| <i>grpE</i>                            | 3         | Del-G         | 39           | Glu14fs          |
| <i>clpP</i>                            | 3         | Del-C         | 365          | Gly122fs         |
| <i>dnaK</i>                            | 3         | G-->A         | 1115         | Ala372Val        |
| <i>dacB</i>                            | 4         | C-->T         | 343          | Gly115Ser        |
| <b>CEFTAZIDIME/AVIBACTAM TREATMENT</b> |           |               |              |                  |
| <i>dnaJ</i>                            | 5         | G-->A         | 1081         | Pro361Ser        |
| <i>pepA</i>                            | 6         | C-->T         | 1439         | Gly480Asp        |
| <i>ctpA</i>                            | 6         | G-->A         | 971          | Ser324Asn        |
| <i>glnD</i>                            | 6         | Ins-G         | 2466-2467    | Asp823fs         |
| <i>flgF</i>                            | 6         | C-->A         | 676          | Glu226*          |
| <i>pcm</i>                             | 8         | Ins-G         | 530-531      | Arg180fs         |
| <i>spoT</i>                            | 8         | T-->C         | 931          | Phe311Leu        |

|                                               |    |           |         |           |
|-----------------------------------------------|----|-----------|---------|-----------|
| <i>PA14_45870</i>                             | 5  | Del-21 pb | 712-732 | Glu238fs  |
| <i>PA14_45880</i>                             | 7  | C-->A     | 159     | Met53Ile  |
|                                               | 7  | G-->A     | 1001    | Ser334Leu |
| <i>PA14_45890</i>                             | 7  | G-->A     | 836     | Pro279Leu |
|                                               | 5  | G-->A     | 830     | Ala277Val |
| <b>INTERGENIC MUTATIONS</b>                   |    |           |         |           |
| <b>Between</b>                                |    |           |         |           |
| <i>PA14_45410</i> and<br><i>PA14_45430</i>    | 10 | C-->T     | 4044801 | -         |
| <b>Between 16S</b>                            |    |           |         |           |
| <b>ribosomal RNA</b> and<br><i>PA14_70920</i> | 12 | T-->C     | 6317713 | -         |
| <b>Between <i>grpE</i> and</b>                |    |           |         |           |
| <i>recN</i>                                   | 1  | T-->C     | 5621761 | -         |
| <b>Between <i>mexR</i> and</b>                |    |           |         |           |
| <i>mexA</i>                                   | 2  | C-->T     | 486683  | -         |

Nucleotide location of the mutations and associated amino acid changes. Genetic modifications in intergenic regions are also included, and their locations referred to the nucleotide position in *P. aeruginosa* UCBPP-PA14 reference chromosome (NC\_008463.1). Fs: frameshift. \*: stop codon. Del: deletion. Ins: insertion.

**Supplementary Table S2 | Primers used to verify nucleotide modifications detected in whole-genome sequencing.**

| Gene        | Genetic change | Localization | Primer fw (5'-3')     | Primer rv (5'-3')    |
|-------------|----------------|--------------|-----------------------|----------------------|
| SNVs/MNVs   |                |              |                       |                      |
| <i>nalD</i> | C-->A          | 32           | AATACTTCGAGTCCGCCC    | TTGAGCATCTCGTTGAACAG |
| <i>mexB</i> | C-->G          | 1126         | ATCCTCCTCGTGTTCCCTG   | CAGGTATTCGCGCATC     |
|             | C-->T          | 1345         |                       |                      |
|             | C-->T          | 1693         |                       |                      |
|             | T-->G          | 2300         |                       |                      |
| <i>ftsI</i> | C-->T          | 1510         | AACAAGTGGTCGAGGCCCCAG | TGCTGTTCGGTGGCCGT    |
|             | G-->A          | 1567         |                       |                      |
|             | G-->A          | 1511         |                       |                      |
|             | G-->A          | 851          |                       |                      |
| <i>clpA</i> | Del-A          | 515          | TCAAGCAGCAGAGCATCGC   | CTACCAGCAGCGGGTTGTT  |
|             | A-->G          | 1634         | TCGTTCTCTTCGCCGGT     | CGTTGTTGTCGGTCAGGGT  |
| <i>mexR</i> | Ins-A          | 80-81        | ATGAACTACCCCGTGAAT    | AAGCTGCGCTGGTCGCT    |
|             | Del-AAT        | 126-128      |                       |                      |
| <i>mpl</i>  | T-->G          | 371          | GAGCATGTCCTGAACAAGGG  | CGGTAATGGACGAACTTCGA |
|             | T-->G          | 416          |                       |                      |

|                   |               |           |                       |                      |
|-------------------|---------------|-----------|-----------------------|----------------------|
| <i>mpl</i>        | Del-CGGCGGCTT | 1305-1313 | AACCTGGGCTGGGACCT     | TCACTCGGCCAGCGCCGC   |
| <i>orfN</i>       | Ins-G         | 138-139   | ATGGACGTTCCCAATGCCCG  | CCGCCAGAATCAGCAAAACC |
| <i>infB</i>       | C-->T         | 2407      | ATCTGCGGGAGAACATCCT   | CCTTCTCGAACACTTCGATC |
| <i>pitA</i>       | A-->C         | 133       | ATGTTTCGATCTTTTCAGCGG | CGCGATGTCGATCGCCTT   |
| <i>grpE</i>       | Del-G         | 39        | GAACCGTGGAAAGCCGTCCC  | AACTTGTGCGCCTTCTCGAC |
| <i>clpP</i>       | Del-C         | 365       | TTGCTGTTCCCTGGAGGCTGA | TTCAGACGTCCTTGATGAA  |
| <i>dnaK</i>       | G-->A         | 1115      | TGAAGGATGCCGGCCTGGAT  | TCTTGTGGACGCTGAAGA   |
| <i>dacB</i>       | C-->T         | 343       | ACCTATGCCGCCCTGGAAA   | CGTCGTTGAATACCGCAA   |
| <i>dnaJ</i>       | G-->A         | 1081      | AAGCTGTTCCGCCTGCGCG   | ATAAAACCACTCCACGCG   |
| <i>PA14_45870</i> | Del-21 pb     | 712-732   | TCGAGAACAAGCTGCTGCAT  | CGGTACTGGTCAGCATCT   |
| <i>pepA</i>       | C-->T         | 1439      | CTGTTCGACGAATACCAGGA  | TCACTTGGCCCCGTTCCAG  |
| <i>ctpA</i>       | G-->A         | 971       | AGGAAGTGGTCAAGGCGCT   | TGGATGGAGCGCCCGTT    |
| <i>glnD</i>       | Ins-G         | 2466-2467 | ACTCCATCGGCAACAACCC   | ACAGCTGCTCGACCAGGGC  |
| <i>flgF</i>       | C-->A         | 676       | TGAAGCAGATGGAGAAGGG   | TTAGCTGATTTGCAAAACCC |
| <i>PA14_45880</i> | C-->A         | 159       | TCGAGGACGAGGCGAAGA    | CGAGGAAGGAGAACGGCTGA |
| <i>pcm</i>        | Ins-G         | 530-531   | TTCGTTGGGGCGATGGCTG   | TACCGAGTCGAGTACCTGG  |
| <i>spoT</i>       | T-->C         | 931       | TCAACGAGATCATGGACGTC  | CTCGTCGTTGGACTTGTACA |

|                        |               |                 |                       |                      |
|------------------------|---------------|-----------------|-----------------------|----------------------|
| <i>PA14_45890</i>      | G-->A         | 1001            | GCCAACGACCAGTTGTTCAA  | ACCGTAGCGACGATCAGGGT |
|                        | G-->A         | 836             |                       |                      |
|                        | G-->A         | 830             |                       |                      |
| <b>LARGE DELETIONS</b> |               |                 |                       |                      |
| <b>Del 1</b>           | Del 55009 bp  | 3387426-3442435 | ATGCAACACAGCCAAGTGT   | TCAGAACGGTTTGGTCGGCA |
|                        |               |                 | CTGTTCGAGATCGTCGAAGG  | TTCGAACTCTTTCTCCTGTA |
| <b>Del 2</b>           | Del 220701 bp | 3288650-3509351 | ATGCAACACAGCCAAGTGT   | TCAGAACGGTTTGGTCGGCA |
|                        |               |                 | CTGTTCGAGATCGTCGAAGG  | TTCGAACTCTTTCTCCTGTA |
| <b>Del 3</b>           | Del 258271 bp | 3210297-3468568 | GCTTCACCGGTTTCGCTGAAG | TCAGTCAATCGCCGCCCG   |
|                        |               |                 | CTGTTCGAGATCGTCGAAGG  | TTCGAACTCTTTCTCCTGTA |
| <b>Del 4</b>           | Del 299648 bp | 3200274-3499932 | GCTTCACCGGTTTCGCTGAAG | TCAGTCAATCGCCGCCCG   |
|                        |               |                 | CTGTTCGAGATCGTCGAAGG  | TTCGAACTCTTTCTCCTGTA |
| <b>Del 5</b>           | Del 442741 bp | 3203830-3646571 | GCTTCACCGGTTTCGCTGAAG | TCAGTCAATCGCCGCCCG   |
|                        |               |                 | GTGGGCAGCATCTACCTGATT | TGATGAGTTCCGGCGCCTT  |

The locations of SNVs/MNVs are referred to the specific gene, whereas the large deletions locations remit to the nucleotide position in *P. aeruginosa* UCBPP-PA14 reference chromosome (NC\_008463.1).

**Supplementary Table S3 | MIC values ( $\mu\text{g/ml}$ ) obtained by antibiotic dilution for the population replicates during selective pressure with either ceftazidime or ceftazidime/avibactam.**

| Treatment                              | Replicate | 5 d | 10 d | 15 d | 20 d | 25 d | 30 d |
|----------------------------------------|-----------|-----|------|------|------|------|------|
| <b>CEFTAZIDIME</b>                     | <b>1</b>  | 20  | 40   | 75   | 100  | 300  | 300  |
|                                        | <b>2</b>  | 20  | 60   | 250  | 300  | 400  | 400  |
|                                        | <b>3</b>  | 20  | 40   | 75   | 100  | 150  | 150  |
|                                        | <b>4</b>  | 25  | 40   | 100  | 400  | 300  | 400  |
| <b>CEFTAZIDIME<br/>+<br/>AVIBACTAM</b> | <b>5</b>  | 40  | 50   | 150  | 250  | 300  | 400  |
|                                        | <b>6</b>  | 15  | 30   | 75   | 250  | 400  | 200  |
|                                        | <b>7</b>  | 20  | 80   | 200  | 400  | 300  | 400  |
|                                        | <b>8</b>  | 15  | 40   | 50   | 75   | 150  | 150  |
| <b>CONTROLS</b>                        | <b>9</b>  | 4   | 4    | 4    | 4    | 4    | 4    |
|                                        | <b>10</b> | 4   | 4    | 4    | 4    | 4    | 4    |
|                                        | <b>11</b> | 4   | 4    | 4    | 4    | 4    | 4    |
|                                        | <b>12</b> | 4   | 4    | 4    | 4    | 4    | 4    |

The table shows the liquid MIC values against ceftazidime for each replicate population every five days (the antibiotic concentration was doubled every 5 days). The grey boxes indicate the steps in which these particular replicates were unable to grow. In these situations, the previous ceftazidime concentrations (8MIC in populations 6, 8; and 16MIC in populations 3, 7) were maintained for the rest of the experiment.

**Supplementary Table S4 | Disk diffusion tests with antibiotics of distinct structural families in the ceftazidime and ceftazidime/avibactam final evolved populations.**

| Sample                         | TGC        | TET       | ATM       | IPM       | MEM       | CAZ       | CIP      | LVX      | NOR       | TOB       | STR       | AMK       | GEN        | CST       | PMB         | CHL       | ERY       | FOF       |
|--------------------------------|------------|-----------|-----------|-----------|-----------|-----------|----------|----------|-----------|-----------|-----------|-----------|------------|-----------|-------------|-----------|-----------|-----------|
|                                | <b>15*</b> | <b>30</b> | <b>30</b> | <b>10</b> | <b>10</b> | <b>30</b> | <b>5</b> | <b>5</b> | <b>10</b> | <b>10</b> | <b>25</b> | <b>30</b> | <b>120</b> | <b>50</b> | <b>38.1</b> | <b>50</b> | <b>30</b> | <b>50</b> |
| <b>PA14 wt</b>                 | 14         | 16        | 26        | 30        | 21        | 27        | 36       | 31       | 32        | 26        | 22        | 25        | 31         | 17        | 14          | 18        | 13        | 14        |
| <b>CONTROLS</b>                |            |           |           |           |           |           |          |          |           |           |           |           |            |           |             |           |           |           |
| <b>9</b>                       | 12         | 14        | 28        | 30        | 19        | 28        | 37       | 28       | 32        | 22        | 14/21     | 23        | 28         | 17        | 14          | 19        | 13        | 13        |
| <b>10</b>                      | 13         | 15        | 27        | 31        | 17        | 28        | 37       | 29       | 32        | 23        | 20        | 24        | 30         | 17        | 14          | 19        | 12        | 14        |
| <b>11</b>                      | 13         | 15        | 28        | 32        | 18        | 28        | 38       | 30       | 34        | 24        | 21        | 25        | 29         | 17        | 14          | 18        | 12        | 15        |
| <b>12</b>                      | 14         | 15        | 28        | 32        | 23        | 28        | 36       | 27       | 32        | 24        | 20        | 25        | 30         | 17        | 14          | 17        | 12        | 16        |
| <b>CEFTAZIDIME</b>             |            |           |           |           |           |           |          |          |           |           |           |           |            |           |             |           |           |           |
| <b>1</b>                       | 13         | 12        | 0         | 19        | 0         | 0         | 30       | 21       | 26        | 26        | 26        | 29        | 32         | 19        | 15          | 0         | 0         | 27        |
| <b>2</b>                       | 15         | 12        | 0         | 19        | 0         | 0         | 33       | 26       | 28        | 29        | 29        | 31        | 35         | 19        | 16          | 0         | 0         | 33        |
| <b>3</b>                       | 15         | 10        | 0         | 25        | 0         | 0         | 31       | 24       | 28        | 25        | 24        | 28        | 32         | 19        | 16          | 0         | 0         | 27        |
| <b>4</b>                       | 15         | 12        | 0         | 22        | 0         | 0         | 33       | 24       | 28        | 27        | 28        | 31        | 36         | 19        | 16          | 0         | 0         | 31        |
| <b>CEFTAZIDIME + AVIBACTAM</b> |            |           |           |           |           |           |          |          |           |           |           |           |            |           |             |           |           |           |
| <b>5</b>                       | 19         | 19        | 0         | 10        | 0         | 0         | 33       | 30       | 31        | 24        | 23        | 28        | 31         | 17        | 15          | 0         | 6         | 27        |
| <b>6</b>                       | 20         | 22        | 7         | 24        | 0         | 0         | 34       | 30       | 33        | 25        | 22        | 29        | 34         | 18        | 16          | 0         | 0         | 26        |
| <b>7</b>                       | 23         | 22        | 0         | 9         | 0         | 0         | 38       | 32       | 34        | 23        | 22        | 26        | 33         | 19        | 16          | 0         | 0         | 25        |
| <b>8</b>                       | 21         | 19        | 0         | 24        | 0         | 0         | 33       | 29       | 28        | 26        | 24        | 30        | 34         | 19        | 16          | 0         | 0         | 27        |

The table presents the diameters of halo (mm) in the disk diffusion assays for each replicate population at the end of the experimental evolution. The antibiotics in which halos differed were selected for an E-test assay (Table 1). Indeed, in some cases we chose for the E-test only one or two representative cases of a particular structural family, in order to avoid redundancy. \* The load of each antibiotic disk is indicated in  $\mu\text{g}$ .

TGC: tigecycline, TET: tetracycline, ATM: aztreonam, IPM: imipenem, MEM: meropenem, CAZ: ceftazidime, CIP: ciprofloxacin, LVX: levofloxacin, NOR: norfloxacin, TOB: tobramycin, STR: streptomycin, AMK: amikacin, GEN: gentamycin, CST: colistin, PMB: polymyxin B, CHL: chloramphenicol, ERY: erythromycin, FOF: fosfomicin.
